# Supplementary material
Source: Springer Nature journal article supplement (https://www.springermedizin.de/resource/supplementary/12955_2009_674_MOESM2_ESM.pdf/9561056)

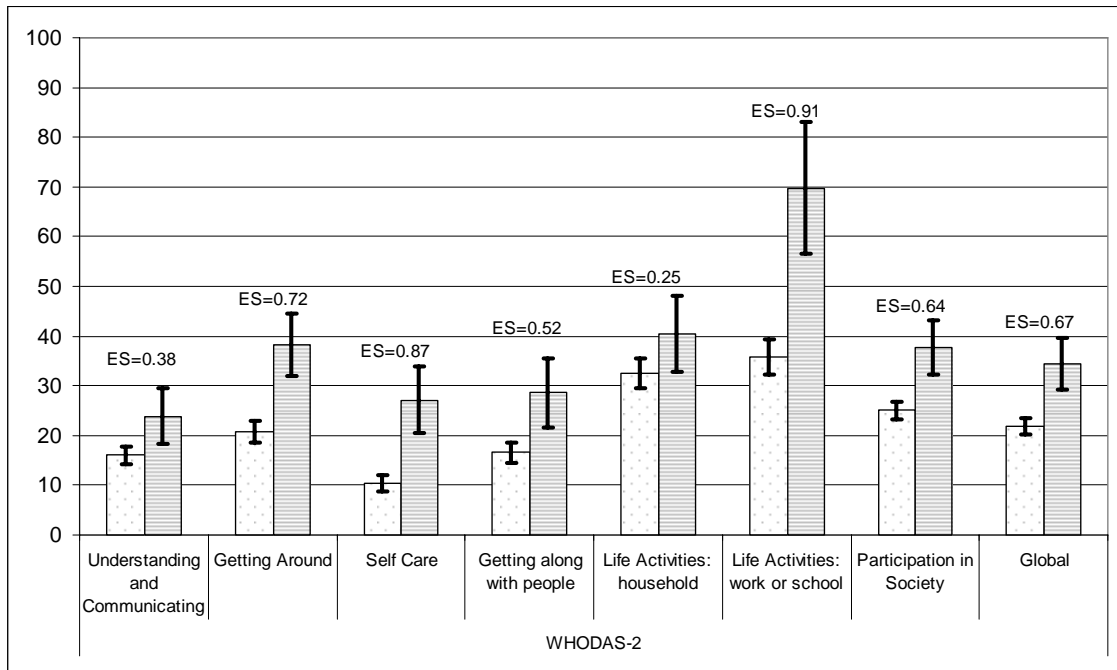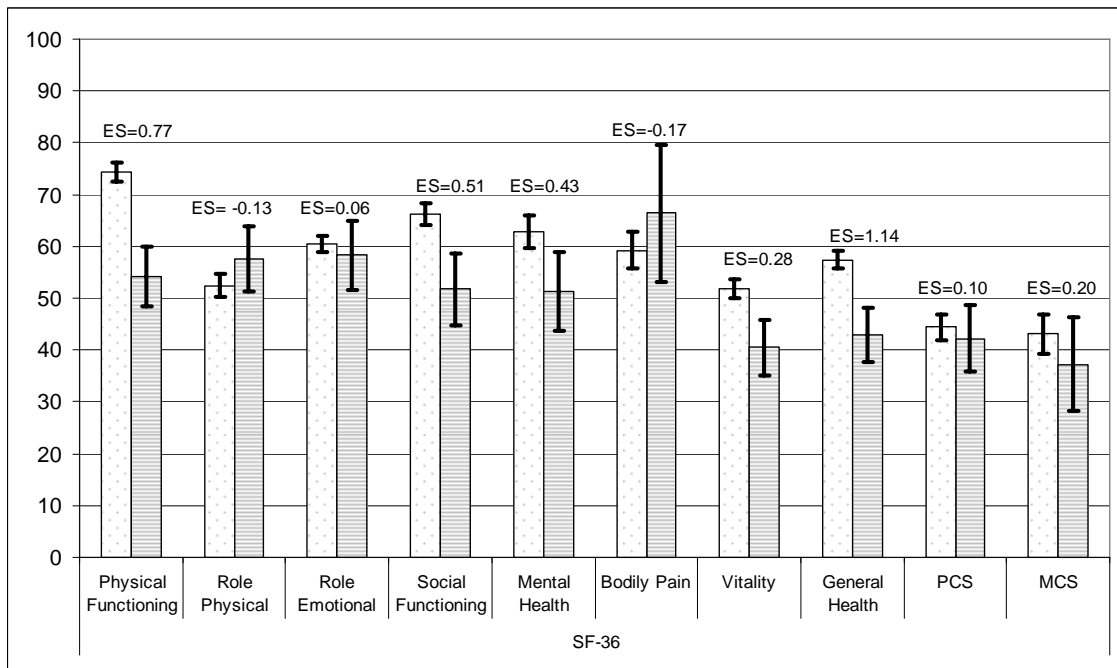

Supplement: MOESM2 [file 9561056]
